1 **KMT5C displays robust retention and liquid-like behavior in phase separated**  
2 **heterochromatin**

3

4 Hilmar Strickfaden,<sup>1</sup> Kristal Missiaen,<sup>1</sup> Michael J. Hendzel,<sup>1,2</sup> and D. Alan Underhill<sup>1,3,\*</sup>

5 Departments of <sup>1</sup>Oncology, <sup>2</sup>Cell Biology, and <sup>3</sup>Medical Genetics, Faculty of Medicine &  
6 Dentistry, University of Alberta, Edmonton, Alberta, Canada

7

8 **Abstract**

9 The pericentromere exists as a distinct chromatin compartment that is thought to form by a  
10 process of phase separation. This reflects the ability of the heterochromatin protein CBX5 (*aka*  
11 HP1 $\alpha$ ) to form liquid condensates that encapsulate pericentromeres.<sup>1,2</sup> In general, phase  
12 separation compartmentalizes specific activities within the cell, but unlike membrane-bound  
13 organelles, their contents rapidly exchange with their surroundings.<sup>3</sup> Here, we describe a novel  
14 state for the lysine methyltransferase KMT5C where it diffuses within condensates of  
15 pericentromeric heterochromatin but undergoes strikingly limited nucleoplasmic exchange,  
16 revealing a barrier to exit similar to that of biological membranes. This liquid-like behavior maps  
17 to a discrete protein segment with a small number of conserved sequence features and containing  
18 separable determinants for localization and retention that cooperate to confer strict spatial  
19 control. Accordingly, loss of KMT5C retention led to aberrant spreading of its catalytic product  
20 (H4K20me3) throughout the nucleus. We further found that KMT5C retention was reversible in  
21 response to chromatin state, which differed markedly for CBX5 and the methyl-CpG binding  
22 protein MeCP2, revealing considerable plasticity in the control of these phase separated  
23 assemblies. Our results establish that KMT5C represents a precedent in the biological phase

24 separation<sup>4</sup> continuum that confers robust spatial constraint of a protein and its catalytic activity  
25 without progression to a gel or solid.

26         Analyses of the prototypic heterochromatin protein CBX5 indicated that phase separation  
27 plays an important role in partitioning of pericentromeric heterochromatin.<sup>1,2</sup> This is particularly  
28 evident in mouse interphase nuclei where pericentromeres from multiple chromosomes form  
29 chromocenters.<sup>5</sup> Despite the stable appearance of such assemblies, they are highly dynamic and  
30 their protein constituents rapidly exchange with their surroundings, reflecting low affinity,  
31 multivalent interactions that allow proteins to coalesce into distinct aqueous compartments.<sup>6,7</sup> In  
32 this context, CBX5 enrichment within pericentromeric heterochromatin requires binding to  
33 trimethyllysine-9 on histone H3 (H3K9me3), which is placed by the lysine methyltransferases  
34 SUV39H1 and 2.<sup>8</sup> CBX5 then recruits KMT5C protein to catalyze histone H4 lysine-20  
35 trimethylation (H4K20me3). In fluorescence recovery after photobleaching (FRAP), CBX5  
36 rapidly exchanged between the pericentromere and nucleoplasm,<sup>9</sup> whereas SUV39H2 and  
37 KMT5C appeared to be immobile when entire chromocenters were bleached.<sup>10</sup> Although  
38 concluding that the latter two proteins created a stable scaffold,<sup>10</sup> these studies did not assess  
39 mobility within chromocenters, which would instead suggest retention within a liquid  
40 compartment. To test this fundamentally different model, we queried KMT5C dynamics within  
41 mouse chromocenters in comparison to CBX5 and MeCP2, which also exhibits pericentromeric  
42 enrichment and nucleoplasmic exchange.<sup>10,11</sup> As previously shown with full chromocenter  
43 bleaching,<sup>10,12</sup> KMT5C displayed long recovery times, indicating minimal exchange with the  
44 surrounding nucleoplasm, and was considerably slower than either CBX5 or MeCP2 (Fig. 1a,  
45 Extended Data Videos 1-3). Upon partial bleaching, however, KMT5C fluorescence recovered  
46 (Fig. 1a, Extended Data Videos 4 and 5) and progressed from the non-bleached portion of the

47 chromocenter (Fig. 1b). This occurred on a timescale where there was no appreciable recovery of  
48 fully bleached chromocenters in the same nucleus (Fig. 1b), establishing that KMT5C moved  
49 readily within chromocenters but did not efficiently exchange (Fig. 1c). In the context of phase  
50 separation, this signifies a remarkable barrier to exit that has not been observed for other proteins  
51 without transition to a solid or gel state, which renders them immobile.<sup>13</sup> KMT5C therefore  
52 demonstrates that phase separation can achieve robust compartmentalization while nevertheless  
53 retaining liquid-like mobility.

54 Consistent with this behavior, KMT5C was more efficient in chromocenter localization  
55 than CBX5 (Fig. 1d, e). Unexpectedly, this enrichment did not simply reflect retention because  
56 the unrelated MeCP2 protein had a high partition coefficient (Fig. 1d, e) but underwent  
57 nucleoplasmic exchange (Fig. 1a). MeCP2 therefore defined a third state with regard to  
58 partitioning and mobility, indicating these parameters were separable and occur across a  
59 continuum. Intrinsically disordered regions are also typical of phase-separated proteins,<sup>13,14</sup>  
60 including CBX5.<sup>1,2</sup> Although these features were highly conserved in disorder plots of CBX5  
61 and MeCP2 from representative mammals, they varied for KMT5C along with charge properties  
62 (Fig. 2a, Extended Data Table 1). Whereas MeCP2 had the highest overall percentage of disorder  
63 (76.7), KMT5C exhibited the lowest (33.6), lacked extended regions of disorder, and its profile  
64 was most divergent (Fig. 2a, Extended Data Table 1). This suggests that while CBX5 and  
65 MeCP2 have prototypic features of phase separating proteins, KMT5C achieves demixing  
66 through other means. To this end, CBX5 and MeCP2 contain highly conserved domains that  
67 confer localization to constitutive heterochromatin (Fig. 2a),<sup>15-17</sup> which for KMT5C involves a  
68 C-terminal region<sup>12</sup> that we will refer to as the Chromocenter Retention Domain (CRD).  
69 Sequence identity within the CRD, however, was limited to 18 of 59 residues across mammals

70 (Fig. 2b) and its disorder potential and charge properties (Fig. 2c, Extended Data Table 1) varied  
71 considerably (Fig. 2d). To broadly establish functional relevance of the CRD, we assessed  
72 versions from *Homo sapiens* (*Hs*) and *Mus musculus* (*Mm*), together with *Cavia porcellus* (*Cp*)  
73 and *Bubalus bubalis* (*Bb*) because they exhibited distinct disorder profiles and the greatest range  
74 in pI (8.94-11.92) (Fig. 2c, d). Nevertheless, each CRD derivative displayed robust chromocenter  
75 partitioning (Fig. 2e, f) that was not significantly different from full-length KMT5C, together  
76 with intra-chromocenter mobility and limited exchange (Fig. 2g, Extended Data Videos 6-9). As  
77 a result, the dynamic properties of full-length KMT5C can be entirely recapitulated by this short  
78 protein segment. Although best exemplified by the mouse CRD, the behavior was shared by all  
79 orthologs, suggesting it is driven by common sequence features that are modulated by species-  
80 specific differences.

81 We next examined the role of conserved residues in the CRD, focusing on C<sup>362</sup>C<sup>366</sup>,  
82 H<sup>357</sup>H<sup>365</sup>, and W<sup>359</sup>W<sup>390</sup>W<sup>392</sup>Y<sup>396</sup> (Fig. 2b), because they resembled features found in chromatin  
83 reader modules that jointly recognize DNA and histones.<sup>18</sup> Mutation of individual motifs caused  
84 elevated exchange in FRAP assays (Fig. 3a, Extended Data Videos 10-12), which was  
85 accompanied by increased nucleoplasmic abundance (Fig. 3b) and decreased partitioning (Fig.  
86 3c, d). Combining mutants (C<sup>366</sup>W<sup>390</sup>W<sup>392</sup>) abrogated chromocenter localization and led to rapid  
87 mobility (Fig. 3a-d, Extended Data Video 13). These findings established that the CRD has  
88 evolved multiple determinants that cooperate to confer localization and limit its exit from  
89 individual chromocenters, while still supporting a liquid-like state. Non-membranous organelles  
90 that form by phase separation are typically spherical, reflecting a reduction in their surface  
91 area,<sup>19</sup> which prompted us to evaluate this parameter in CRD mutants (Fig. 3e). Importantly,  
92 each of the mutants caused a reduction in sphericity that correlated with their partitioning and

93 dynamic behavior (Fig. 3a-d), with C<sup>362</sup>C<sup>366</sup> being most severe and W<sup>359</sup>W<sup>390</sup>W<sup>392</sup>Y<sup>396</sup> the least.  
94 The extent mutants perturbed CRD activity therefore reflected the degree to which they reduced  
95 the valency or interaction affinity, a finding that is consistent with the behavior of other phase  
96 separated proteins.<sup>13</sup> We extended this analysis to include KMT5C, CBX5, MeCP2, and the  
97 remaining CRDs. Strikingly, KMT5C supported a significantly higher degree of sphericity than  
98 either CBX5 or MeCP2 (Extended Data Fig. 1a), indicating it was more effective at generating  
99 surface tension at the boundary between the chromocenter and nucleoplasm. Moreover, all CRDs  
100 shared this property (Extended Data Fig. 1b), further highlighting that this domain is the key  
101 determinant of the biophysical characteristics of KMT5C.

102 Phase separation by CBX5 is abrogated in *Suv39h1/2* null cells or by mutation that  
103 disrupts H3K9me3 recognition,<sup>1</sup> underscoring the importance of this interaction in seeding liquid  
104 demixing. We found the dynamic behavior of KMT5C exhibited the same dependency, reflected  
105 by its increased mobility and dispersal in cells lacking SUV39H1/2 (Fig. 4a, Extended Data  
106 Videos 14, 15). MECP2, however, displayed more efficient localization and slightly reduced  
107 mobility (Extended Data Fig. 2), indicating the chromocenter can support distinct phase  
108 separated assemblies depending on chromatin context. Another facet of phase separation  
109 involves its reversibility in response to cellular queues.<sup>13</sup> To this end, we evaluated the histone  
110 deacetylase inhibitor Trichostatin A (TSA) because it was known to cause CBX5 displacement  
111 from pericentromeric heterochromatin and increase its mobility.<sup>20</sup> KMT5C, however, largely  
112 retained chromocenter localization, but with elevated nucleoplasmic exchange (Fig. 4b,  
113 Extended Data Video 16), indicating hyperacetylation differentially affects KMT5C and CBX5  
114 demixing in cells. Nevertheless, this modest KMT5C release was associated with a marked  
115 accumulation of H4K20me3 outside of chromocenters (Fig. 4b), establishing that retention is

116 essential to the spatial regulation of its enzymatic activity, which otherwise acts promiscuously.  
117 Alteration of KMT5C dynamics was also apparent upon induction of DNA damage within  
118 chromocenters by laser microirradiation, which is known to induce heterochromatin  
119 decompaction and changes in histone post-translational modifications.<sup>21</sup> Specifically, bisection  
120 of chromocenters using laser microirradiation caused loss of KMT5C from the damaged area,  
121 creating two lobes that preserved the mobility and retention behavior of the original domain (Fig.  
122 4c, Extended Data Videos 17, 18). Unlike the global change observed with TSA treatment, this  
123 reflected a locally confined and precise dissolution in response to underlying chromatin state  
124 changes over a timescale of seconds. Again, the behavior of KMT5C was markedly different  
125 than either CBX5 or MeCP2, which showed residual localization in the damage zone and rapid  
126 mobility (Fig. 4c, d, and Extended Data Videos 19-22). Collectively, these findings indicate that  
127 phase separation can tune constitutive heterochromatin protein content and dynamics in response  
128 to changes in chromatin state and environmental stimuli.

129         The CRD provides a minimalist model to decipher how phase separation can support  
130 spatial confinement while at the same time maintaining liquid-like behavior. Although lacking  
131 many of the typical sequence features of phase separating proteins,<sup>3,13</sup> the CRD met the criterion  
132 of multivalency. Nevertheless, while this normally controls the composition and biophysical  
133 properties of phase separated assemblies via low affinity interactions that allow proteins to  
134 exchange with their surroundings,<sup>3</sup> the CRD underwent very limited exchange. In this regard,  
135 CRD mutants resembled full-length CBX5 in mobility and partitioning, indicating multiple  
136 determinants act in a highly synergistic manner to self-reinforce chromocenter retention. This  
137 behavior was independently supported by the response of KMT5C to inhibition of HDACs (Fig.  
138 4), which partially diminished retention. For *Drosophila* HP1a, H3K9me3 recognition is driven

139 by cation- $\pi$  interactions involving a triad of aromatic residues (Y<sup>24</sup>, W<sup>45</sup>, and Y<sup>48</sup>) within the  
140 chromodomain,<sup>15</sup> and is necessary for heterochromatin phase separation.<sup>2</sup> A key difference in the  
141 CRD is the presence of five aromatic residues (W<sup>359</sup>, W<sup>384</sup>, W<sup>390</sup>, W<sup>392</sup>, and Y<sup>396</sup>) and the  
142 predominance of tryptophan, which confers the strongest cation- $\pi$  interactions<sup>22</sup> and supports  
143 more stable binding of trimethyllysine.<sup>23</sup> Together with multivalency and the capacity for  $\pi$ - $\pi$   
144 interactions,<sup>24</sup> the CRD appears to have evolved unique determinants that are optimized to  
145 confine KMT5C to constitutive heterochromatin. Moreover, when compared to other phase  
146 separating proteins, this activity has been consolidated into a limited number of sequence  
147 features that are sufficient to reduce chromocenter surface area and enable exquisite control of  
148 protein localization in the aqueous phase.

149 Phase separation can be described in phase diagrams where changes in protein  
150 concentration and interaction strength give rise to assemblies with distinct material properties,<sup>19</sup>  
151 including gels, glassy solids, and pathological aggregates.<sup>13</sup> The latter are states where molecules  
152 are immobile, retain their relative positions to each other, and do not exchange with their  
153 surroundings.<sup>19</sup> This is clearly not what we have described for KMT5C, which remained in a  
154 liquid state despite limited exchange that initially suggested it was immobile.<sup>12</sup> Although in  
155 principle high partitioning to a phase separated compartment has the potential to drive retention,<sup>3</sup>  
156 the behavior of MeCP2 indicates that this feature alone is not sufficient, but also requires a high  
157 energy barrier to exit. For KMT5C, this combination allows it to be effectively biocontained  
158 within a phase separated ‘organelle’ and affords tight spatial control of H4K20me3 catalysis.  
159 This is notable given it constitutes a minority of the methylated H4K20 pool<sup>25</sup> and is primarily  
160 associated with satellite and other distinct repeats.<sup>26</sup> This control is lost when KMT5C is no  
161 longer constrained in demixed assemblies (Fig. 4). Moreover, the opposing behaviors of KMT5C

162 and MeCP2 indicated that change of a single epigenetic feature can dramatically reprogram the  
163 phase separated state with regard to protein composition and dynamics. Of particular relevance  
164 to this finding, MeCP2 loss in a mouse model of Rett syndrome leads to H4K20me3 gain in the  
165 chromocenter, supporting an antagonistic relationship with KMT5C *in vivo* at endogenous  
166 protein levels.<sup>27</sup> This principle is also supported by an altered chromocenter proteome in  
167 *Suv39h1/2* knockout cells<sup>28</sup> and the established plasticity of constitutive heterochromatin in  
168 development and disease.<sup>29</sup> The existence of these distinct phase separated states therefore  
169 provides a conceptual framework to understand the drivers of normal and pathogenic  
170 chromocenter homeostasis. By considering chromatin as a multivalent scaffold, we can decipher  
171 how changes in epigenetic features and the mutational status of resident proteins shift the  
172 composition and function of phase separated assemblies.



173 **Methods**

174 **Cell Culture and transfection**

175 Cells were cultured at 37°C and 5% CO<sub>2</sub> in a humidified incubator. All cell lines were grown in  
176 DMEM containing 10% FBS. D5 (*Suv39h1/2* knockout) and W8 (*Suv39h1/2* wild-type) mouse  
177 embryonic fibroblast cells lines<sup>8</sup> were obtained from Dr. Thomas Jenuwein. All other analyses  
178 were carried out using the mouse NMuMG breast cell line. Cells were transfected by lipofection  
179 using Effectene (Qiagen) 1 day prior to experiments. Expression plasmids were synthesized  
180 (www.biomatik.com), obtained from the Addgene repository (www.addgene.org), or previously  
181 described<sup>30</sup> (sequences provided in supplemental material).

182

183 **Live-cell imaging**

184 Live cell imaging was carried out using Zeiss Axiovert 200M inverted microscopes attached to  
185 either an LSM510 NLO laser scanning system with a 25 mW argon laser line, a Zeiss LSM 770  
186 confocal microscope attached to an Axio Observer Z3 equipped with 405, 488, 561, and 633 nm  
187 diode lasers, or a PerkinElmer Ultraview spinning-disk confocal microscope equipped with 405,  
188 488, and 561 nm diode lasers and a FRAP-unit. For all platforms, a 40 x 1.3 NA oil immersion  
189 lens was used. Long-term live-cell observations were conducted on the spinning disk microscope  
190 at 37°C in a humidified atmosphere containing 5% CO<sub>2</sub>. In cases where Z-stacks were acquired,  
191 spacing was set at 400 nm. Fluorescence recovery after photobleaching was performed on  
192 transiently transfected cells using the 488 nm solid state (spinning disk confocal) or 488 nm  
193 argon laser line (LSM 510). Circular (chromocenter) or linear (nucleoplasm) regions were  
194 demarcated and subsequently bleached by intense light from the 488 nm laser. Fluorescence  
195 recovery of the bleached regions was quantified over multiple time scales (seconds to minutes).

196 FRAP data was extracted using Zeiss LSM 5 Zen or ImageJ software by measuring fluorescence  
197 intensity of the background, the whole nucleus and the bleached area in each of the recorded  
198 time-lapse pictures for a minimum of 30 cells. Normalized relative intensity (including standard  
199 deviation) was calculated in Microsoft Excel and plotted using Graphpad Prism software. Laser  
200 microirradiation experiments were performed using the spinning disk microscope using the 100 x  
201 1.4 NA objective lens. Cells were grown in MatTek 35 mm glass bottom dishes and were  
202 sensitized with 1  $\mu\text{g}/\mu\text{l}$  Hoechst 20 min prior to the experiment. After calibration of the  
203 photokinesis device, a thin horizontal line representing the region to be microirradiated was  
204 placed so that it divided the chromocenter into approximately two equal parts. Laser  
205 microirradiation was carried out by using 20% power of the 405 nm solid state laser and 10  
206 iterations. Images were acquired at defined time intervals using laser and filter settings for GFP  
207 imaging. Subsequent photobleaching of the non-microirradiated portion of chromocenters was  
208 done using 10 iterations at 100% power of the 488 nm solid state laser.

209

## 210 **Immunofluorescence**

211 Cells grown on adherent coverslips were fixed in 4% paraformaldehyde in PBS for 10 min,  
212 permeabilized in 0.5 % Triton X-100 in PBS for 5min and then incubated with primary  
213 antibodies diluted in PBS. After 30 min at room temperature, the cells were washed once with  
214 0.1 % Triton X-100 in PBS for 1 min then rinsed 3 times with PBS prior to addition of secondary  
215 antibodies diluted in PBS. Cells were incubated for 30 min at room temperature, washed with 0.1  
216 % Triton X-100 in PBS for 1 min and rinsed three times with PBS. Coverslips were mounted  
217 onto microscope slides with in-house made polyvinyl alcohol mounting media containing 1  
218  $\mu\text{g}/\text{mL}$  4',6-diamidino-2-phenylindole (DAPI). Z-Stacks were obtained on a Zeiss Imager.Z1

219 equipped with a Photometrics Prime BSI camera and Metamorph software version 7.10.2.240  
220 (Molecular Devices, Sunnyvale, CA) using a Zeiss 63 x 1.3 NA oil lens. Step size used was 0.2  
221  $\mu\text{m}$ . Primary antibodies and dilutions were as follows:  $\alpha\text{-H4K20me3}$  (Active Motif 39672),  
222 1:500; and  $\alpha\text{-H3K9me3}$  (Active Motif 3916). Secondary antibodies and dilutions were as  
223 follows: goat  $\alpha\text{-mouse Alexa-488}$ , 1:500; goat  $\alpha\text{-rabbit Alexa-488}$  1:500; and goat  $\alpha\text{-mouse}$   
224 Cy3, 1:500.

225

### 226 **Image analysis**

227 Images were deconvolved with Huygens Professional version 19.04 (Scientific Volume Imaging,  
228 <http://svi.nl>). Z-stacks were imported into Imaris 9.3 (Oxford Instruments) and cropped to  
229 generate 3D images of single nuclei. The Imaris *surfaces* function was used to encapsulate all  
230 chromocentres with a shell and the *statistics* function was used to measure the volume,  
231 sphericity, and total number of chromocenters for output to a Microsoft Excel spreadsheet.  
232 Graphical representation of the data was prepared using the PlotsOfDifferences server  
233 (<https://huygens.science.uva.nl/PlotsOfDifferences/>).<sup>31</sup> For partition coefficients, line scans  
234 through nuclei of undeconvolved 3D images were recorded using ImageJ. For each cell, the  
235 partition coefficient was calculated by subtracting the background level from the maxima of the  
236 brightest chromocenter and dividing it by the background corrected fluorescence intensity of the  
237 nucleoplasm. For each protein analyzed, measurements were taken from  $n > 10$  nuclei.

238

### 239 **Statistical analysis**

240 For partition coefficients, significance was evaluated using the Kruskal-Wallis one-way analysis  
241 test and individual comparisons between proteins were done using the Wilcoxon rank sum test.

- 242 Statistical significance of sphericity data was evaluated using the embedded stats function within  
243 `PlotsOfDifferences`, which calculates p-values using a randomization test.<sup>31</sup>

244 **References**

- 245 1 Larson, A. G. *et al.* Liquid droplet formation by HP1 alpha suggests a role for phase  
246 separation in heterochromatin. *Nature* **547**, 236-240, doi:10.1038/nature22822 (2017).
- 247 2 Strom, A. R. *et al.* Phase separation drives heterochromatin domain formation. *Nature*  
248 **547**, 241-245, doi:10.1038/nature22989 (2017).
- 249 3 Banani, S. F., Lee, H. O., Hyman, A. A. & Rosen, M. K. Biomolecular condensates:  
250 organizers of cellular biochemistry. *Nat Rev Mol Cell Biol* **18**, 285-298,  
251 doi:10.1038/nrm.2017.7 (2017).
- 252 4 Alberti, S. The wisdom of crowds: regulating cell function through condensed states of  
253 living matter. *J Cell Sci* **130**, 2789-2796, doi:10.1242/jcs.200295 (2017).
- 254 5 Haaf, T. & Schmid, M. Chromosome topology in mammalian interphase nuclei. *Exp Cell*  
255 *Res* **192**, 325-332 (1991).
- 256 6 Erdel, F. & Rippe, K. Formation of Chromatin Subcompartments by Phase Separation.  
257 *Biophysical journal* **114**, 2262-2270, doi:10.1016/j.bpj.2018.03.011 (2018).
- 258 7 Larson, A. G. & Narlikar, G. J. The Role of Phase Separation in Heterochromatin  
259 Formation, Function, and Regulation. *Biochemistry* **57**, 2540-2548,  
260 doi:10.1021/acs.biochem.8b00401 (2018).
- 261 8 Peters, A. H. *et al.* Loss of the Suv39h histone methyltransferases impairs mammalian  
262 heterochromatin and genome stability. *Cell* **107**, 323-337 (2001).
- 263 9 Cheutin, T. *et al.* Maintenance of stable heterochromatin domains by dynamic HP1  
264 binding. *Science* **299**, 721-725, doi:10.1126/science.1078572 (2003).

- 265 10 Muller-Ott, K. *et al.* Specificity, propagation, and memory of pericentric  
266 heterochromatin. *Molecular systems biology* **10**, 746, doi:10.15252/msb.20145377  
267 (2014).
- 268 11 Kumar, A. *et al.* Analysis of protein domains and Rett syndrome mutations indicate that  
269 multiple regions influence chromatin-binding dynamics of the chromatin-associated  
270 protein MECP2 in vivo. *J Cell Sci* **121**, 1128-1137, doi:10.1242/jcs.016865 (2008).
- 271 12 Hahn, M. *et al.* Suv4-20h2 mediates chromatin compaction and is important for cohesin  
272 recruitment to heterochromatin. *Genes Dev* **27**, 859-872, doi:10.1101/gad.210377.112  
273 (2013).
- 274 13 Shin, Y. & Brangwynne, C. P. Liquid phase condensation in cell physiology and disease.  
275 *Science* **357**, doi:10.1126/science.aaf4382 (2017).
- 276 14 Zhu, L. & Brangwynne, C. P. Nuclear bodies: the emerging biophysics of nucleoplasmic  
277 phases. *Curr Opin Cell Biol* **34**, 23-30, doi:10.1016/j.ceb.2015.04.003 (2015).
- 278 15 Jacobs, S. A. & Khorasanizadeh, S. Structure of HP1 chromodomain bound to a lysine 9-  
279 methylated histone H3 tail. *Science* **295**, 2080-2083, doi:10.1126/science.1069473  
280 (2002).
- 281 16 Nielsen, P. R. *et al.* Structure of the HP1 chromodomain bound to histone H3 methylated  
282 at lysine 9. *Nature* **416**, 103-107, doi:10.1038/nature722 (2002).
- 283 17 Ohki, I. *et al.* Solution structure of the methyl-CpG binding domain of human MBD1 in  
284 complex with methylated DNA. *Cell* **105**, 487-497 (2001).
- 285 18 Weaver, T. M., Morrison, E. A. & Musselman, C. A. Reading More than Histones: The  
286 Prevalence of Nucleic Acid Binding among Reader Domains. *Molecules* **23**,  
287 doi:10.3390/molecules23102614 (2018).

- 288 19 Hyman, A. A., Weber, C. A. & Julicher, F. Liquid-liquid phase separation in biology.  
289 *Annu Rev Cell Dev Biol* **30**, 39-58, doi:10.1146/annurev-cellbio-100913-013325 (2014).
- 290 20 Taddei, A., Maison, C., Roche, D. & Almouzni, G. Reversible disruption of pericentric  
291 heterochromatin and centromere function by inhibiting deacetylases. *Nat Cell Biol* **3**,  
292 114-120, doi:10.1038/35055010 (2001).
- 293 21 Murray, J. M., Stiff, T. & Jeggo, P. A. DNA double-strand break repair within  
294 heterochromatic regions. *Biochemical Society transactions* **40**, 173-178,  
295 doi:10.1042/BST20110631 (2012).
- 296 22 Dougherty, D. A. Cation- $\pi$  interactions in chemistry and biology: a new view of  
297 benzene, Phe, Tyr, and Trp. *Science* **271**, 163-168, doi:10.1126/science.271.5246.163  
298 (1996).
- 299 23 Riemen, A. J. & Waters, M. L. Design of highly stabilized beta-hairpin peptides through  
300 cation- $\pi$  interactions of lysine and n-methyllysine with an aromatic pocket. *Biochemistry*  
301 **48**, 1525-1531, doi:10.1021/bi801706k (2009).
- 302 24 Vernon, R. M. *et al.*  $\pi$ - $\pi$  contacts are an overlooked protein feature relevant to phase  
303 separation. *eLife* **7**, doi:10.7554/eLife.31486 (2018).
- 304 25 Pesavento, J. J., Yang, H., Kelleher, N. L. & Mizzen, C. A. Certain and progressive  
305 methylation of histone H4 at lysine 20 during the cell cycle. *Mol Cell Biol* **28**, 468-486  
306 (2008).
- 307 26 Mikkelsen, T. S. *et al.* Genome-wide maps of chromatin state in pluripotent and lineage-  
308 committed cells. *Nature* **448**, 553-560 (2007).

- 309 27 Linhoff, M. W., Garg, S. K. & Mandel, G. A high-resolution imaging approach to  
310 investigate chromatin architecture in complex tissues. *Cell* **163**, 246-255,  
311 doi:10.1016/j.cell.2015.09.002 (2015).
- 312 28 Saksouk, N. *et al.* Redundant mechanisms to form silent chromatin at pericentromeric  
313 regions rely on BEND3 and DNA methylation. *Mol Cell* **56**, 580-594,  
314 doi:10.1016/j.molcel.2014.10.001 (2014).
- 315 29 Dejardin, J. Switching between Epigenetic States at Pericentromeric Heterochromatin.  
316 *Trends Genet* **31**, 661-672, doi:10.1016/j.tig.2015.09.003 (2015).
- 317 30 Tsang, L. W., Hu, N. & Underhill, D. A. Comparative analyses of SUV420H1 isoforms  
318 and SUV420H2 reveal differences in their cellular localization and effects on myogenic  
319 differentiation. *PLoS ONE* **5**, e14447, doi:10.1371/journal.pone.0014447 (2010).
- 320 31 Goedhart, J. PlotsOfDifferences – a web app for the quantitative comparison of unpaired  
321 data. *bioRxiv*, 578575, doi:10.1101/578575 (2019).
- 322 32 Sievers, F. *et al.* Fast, scalable generation of high-quality protein multiple sequence  
323 alignments using Clustal Omega. *Molecular systems biology* **7**, 539,  
324 doi:10.1038/msb.2011.75 (2011).
- 325 33 Peng, K. *et al.* Optimizing long intrinsic disorder predictors with protein evolutionary  
326 information. *J Bioinform Comput Biol* **3**, 35-60 (2005).
- 327 34 Drozdetskiy, A., Cole, C., Procter, J. & Barton, G. J. JPred4: a protein secondary  
328 structure prediction server. *Nucleic Acids Res* **43**, W389-394, doi:10.1093/nar/gkv332  
329 (2015).
- 330 35 Schotta, G. *et al.* A silencing pathway to induce H3-K9 and H4-K20 trimethylation at  
331 constitutive heterochromatin. *Genes Dev* **18**, 1251-1262 (2004).

332



333 **Extended Data**

334 **Videos**

335 Video 1; KMT5C FRAP

336 Video 2; MeCP2 FRAP

337 Video 3; CBX5 FRAP

338 Video 4; Partial KMT5C bleach (doughnut)

339 Video 5; Partial KMT5C bleach (bridge)

340 Video 6; *Homo sapiens* CRD FRAP

341 Video 7; *Mus musculus* CRD FRAP

342 Video 8; *Cavia porcellus* CRD FRAP

343 Video 9; *Bubalus bubalis* CRD FRAP

344 Video 10; CRDC<sup>362</sup>C<sup>366</sup> FRAP

345 Video 11; CRDH<sup>357</sup>H<sup>365</sup> FRAP

346 Video 12; CRDW<sup>359</sup>W<sup>390</sup>W<sup>392</sup>Y<sup>396</sup> FRAP

347 Video 13; CRDC<sup>366</sup>W<sup>390</sup>W<sup>392</sup> FRAP

348 Video 14; KMT5C in D5; *Suv39h1/2* knockout FRAP

349 Video 15; KMT5C in W8; *Suv39h1/2* wild-type FRAP

350 Video 16; KMT5C with TSA FRAP (no TSA control; Video 1)

351 Video 17; KMT5C laser microirradiation

352 Video 18; KMT5C laser microirradiation + FRAP

353 Video 19; MeCP2 laser microirradiation

354 Video 20; MeCP2 laser microirradiation + FRAP

355 Video 21; CBX5 laser microirradiation

356 Video 22, CBX5 laser microirradiation + FRAP

357

358 **Figures and Tables**

359 Table 1; Spreadsheet 1; PCH PONDR excel; additional species disorder and physicochemical

360 data for KMT5C, MeCP2, CBX5, and CRD

361 Figure 1; Sphericity data for (a) KMT5C, MeCP2, CBX5, (b) *Hs*, *Cp*, *Bb*, and *Cp* CRDs, and (c)

362 wild-type and mutant CRDs.

363 Figure 2; MeCP2 (a) localization and (b) mobility in D5 (*Suv39h1/2* knockout) and W8

364 (*Suv39h1/2* wild-type) cells

365 **Acknowledgements**

366 The authors acknowledge funding support from the Canadian Breast Cancer Foundation

367 (D.A.U., grant no. 300073), Cancer Research Society (D.A.U. and M.J.H., grant no. CRSDI

368 2018 OG 23446), and Canadian Institutes of Health Research (M.J.H., grant no. PJT-148753).

369 The authors thank Dr. Xuejun Sun and Gerry Barron of the Cross Cancer Institute Cell Imaging

370 Facility for support.

371

372 **Author Contributions**

373 D.A.U. and M.J.H. conceived the project. D.A.U., M.J.H, and H.S. designed all experiments and

374 interpreted data. K.M. made the initial observation of KMT5C mobility and performed FRAP

375 and fluorescence imaging experiments. H.S. performed live-cell imaging, laser micro-irradiation,

376 and partition coefficient analyses. D.A.U. carried out sequence analysis and expression plasmid

377 design. D.A.U. wrote the manuscript with contributions from M.J.H. and H.S. D.A.U. prepared

378 figures with contributions from H.S. and K.M.

379

380 **Containing data deposition statement**

381 N/A

382

383 **Competing interests**

384 The authors declare no competing interests.

385

386 **Corresponding author line**

387 D. A. Underhill Department of Oncology, 2328 Cross Cancer Institute, 11560 University

388 Avenue, Edmonton, Alberta, Canada, T6G 1Z2. Phone: (780) 432-8903, Fax: (780) 432-8892,

389 E-mail: [alan.underhill@ualberta.ca](mailto:alan.underhill@ualberta.ca)

390 **Figure 1. KMT5C is mobile within chromocenters but undergoes limited nucleoplasmic**  
391 **exchange. a**, FRAP curves for KMT5C, MeCP2, and CBX5-mEmerald fusion proteins in mouse  
392 NMuMG breast cancer cells ( $n=30$ ) (see Methods). Partial (*red*) and full (*blue*) fluorescence  
393 recovery curves (*filled circles* represent mean fluorescence intensity, while *vertical lines* indicate  
394 standard deviation. **b**, Time-lapse series of *full* and *partial* KMT5C-mEmerald photobleaching  
395 (Extended Data Movie 4). Insets use a 16-color intensity map to depict fluorescence recovery  
396 upon partial or full bleaching from 0.3 to 60s. The second *partial* panel depicts an independent  
397 recovery event involving a chromatin bridge between two chromocenters (Extended Data Movie  
398 5), indicating they form a contiguous phase separated environment. **c**, Schematic representation  
399 of KMT5C (*green*) movement (*arrows*) in each of the full and partial bleach (*translucent circles*)  
400 time series from panel **b**. **d**, Partition images (16-color intensity map) for KMT5C, CBX5 and  
401 MePC2. **e**, Scatter plots display corresponding partition coefficients for KMT5B ( $n=26$ ), MeCP2  
402 ( $n=30$ ), and CBX5 ( $n=30$ ) (see Methods).  
403

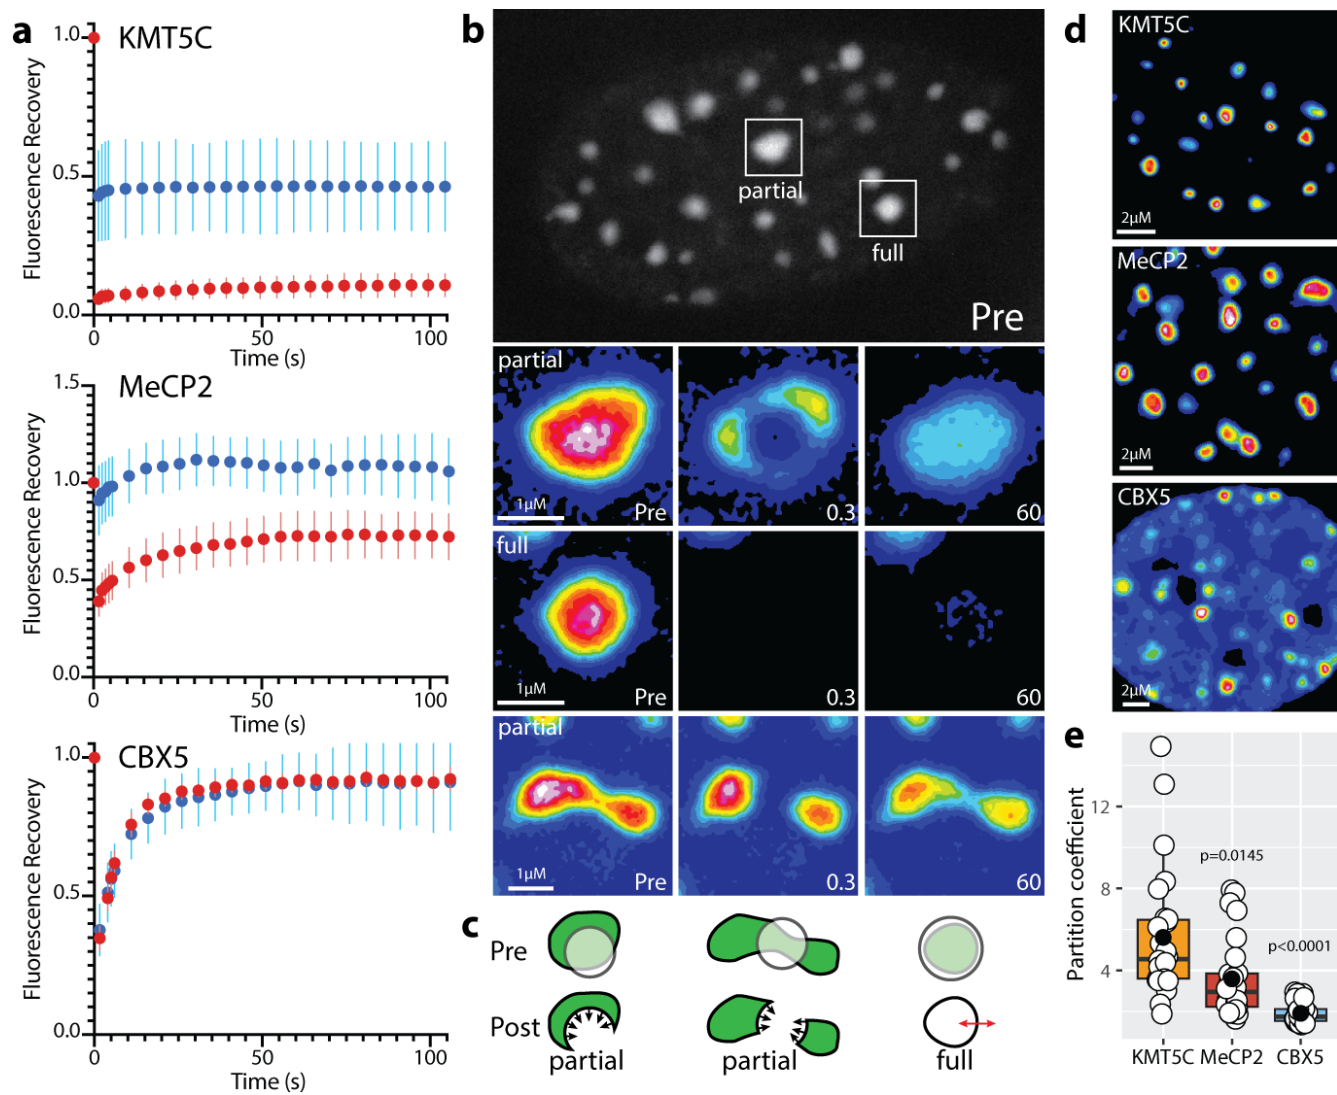

404

405 **Figure 2. The chromocenter retention domain constrains KMT5C to individual**  
406 **chromocenters. a**, Disorder plots (PONDR) and charge heatmaps for KMT5C, CBX5, and  
407 MeCP2 orthologs from *Homo Sapiens* (*Hs*), *Mus musculus* (*Mm*), *Bubalus bubalis* (*Bb*), and  
408 *Cavia porcellus* (*Cp*). For reference, schematics illustrate the distribution of annotated domains  
409 in each protein (Su(var)3-9, Enhancer-of-zeste and Trithorax (SET); RNA-Binding Domain  
410 (RBD); Chromocenter Retention Domain; Methyl-CpG Binding Domain (MBD);  
411 Chromodomain (CD); Hinge domain (H); and Chromoshadow Domain (CD)). Input sequences  
412 were aligned using Clustal Omega<sup>32</sup> together with manual removal of gaps and then analyzed for  
413 disorder using PONDR<sup>33</sup> and charge properties using EMBOSS. Average disorder percentage  
414 and score are indicated to the *right* of the primary structure schematic, and disordered segments  
415 are shown as thick horizontal lines. **b**, Multispecies sequence alignment of the CRD is shown in  
416 JPred<sup>34</sup> format. Residues absolutely conserved in mammals are indicated by a *filled circle*, while  
417 those exhibiting 90% conservation are noted by *open circles*. Amino acids selected for  
418 mutagenesis are numbered. **c**, Disorder plots and charge heatmaps are shown for the CRD  
419 (species and details are as described in panel *a*). **d**, Scatter plots of isoelectric point, disorder  
420 score, disorder %, and disorder length for CBX5, CRD, KMT5C, and MeCP2 across 20  
421 representative mammalian species (Extended Data Table 1). **e**, Partition images (16-color  
422 intensity map) for the CRD from *Hs*, *Mm*, *Cp*, and *Bb* indicate that all effectively partition to  
423 chromocenters. **f**, Partition coefficient graph for *Hs* ( $n=39$ ), *Mm* ( $n=30$ ), *Cp* ( $n=23$ ), and *Bb*  
424 ( $n=26$ ) CRDs demonstrate high chromocenter partitioning. Full-length KMT5C is shown for  
425 reference (*faded*). **g**, FRAP analyses of *Hs*, *Mm*, *Cp*, and *Bb* CRD domains (Extended Data  
426 Movies 6-9) support intra-chromocenter mobility with reduced nucleoplasmic exchange ( $n=30$ ).  
427

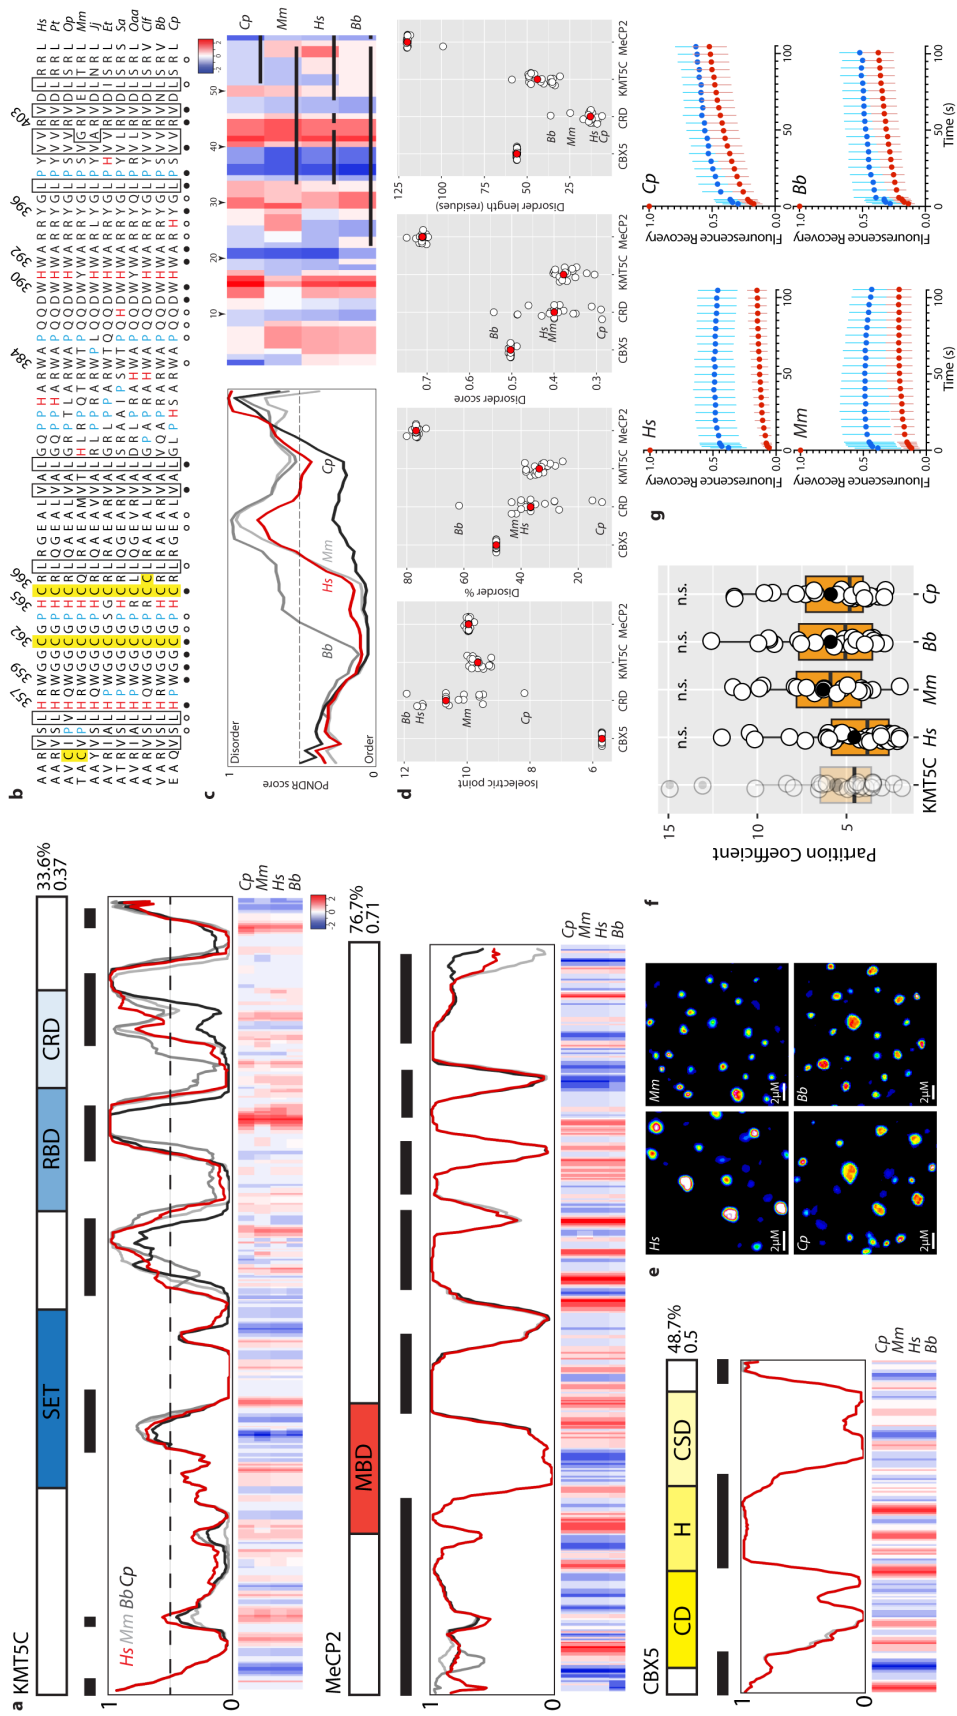



429 **Figure 3. The CRD comprises multiple determinants that cooperate to drive**  
430 **heterochromatin phase separation. a**, FRAP analysis of CRD mutants that target conserved  
431 sequence features ( $C^{362}C^{366}$ ,  $H^{357}H^{365}$ , and  $W^{359}W^{390}W^{392}Y^{396}$ ) or combinations thereof  
432 ( $C^{366}W^{390}W^{392}$ ) ( $n=30$ ). Wild-type KMT5C (*faded*) is shown in the upper left panel for reference  
433 (Extended Data movies 10-13). While the recovery profiles are similar for the  $C^{362}C^{366}$  and  
434  $H^{357}H^{365}$  mutants, they differed for the  $W^{359}W^{390}W^{392}Y^{396}$  and mutants, suggesting they affect  
435 distinct interactions. **b**, Partition images (16-color intensity map) for CRD mutants. **c**, Partition  
436 coefficients for CRD mutants (WT ( $n=39$ ), Trp ( $n=18$ ), His ( $n=17$ ), and Cys ( $n=20$ )). **d**,  
437 Schematic summary illustrates that mutants continue to localize to the chromocenter, but now  
438 readily exchange with the cytoplasmic pool. **e**, Sphericity analysis of the wild-type ( $n=990$ ) and  
439 mutant (Trp ( $n=437$ ), His ( $n=1834$ ), and Cys ( $n=1054$ )) CRDs (see Methods).

440

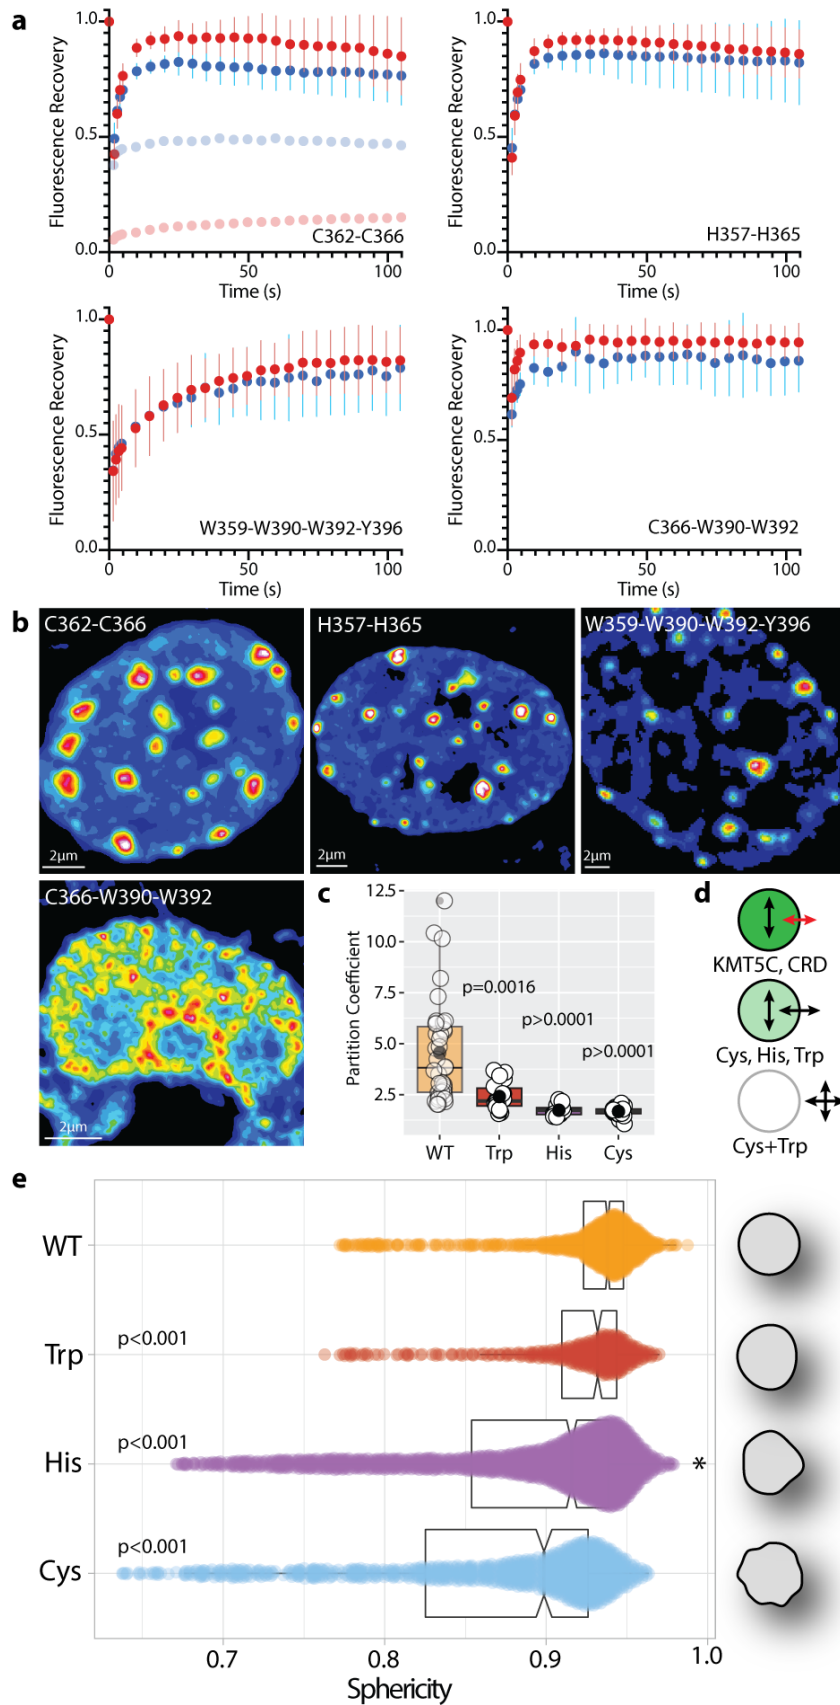

441

442

443 **Figure 4. KMT5C phase separation is rapidly reversible and responsive to underlying**  
444 **chromatin state. a**, KMT5C localization and mobility in *Suv39h1/2* knockout cells. *Top row*,  
445 KMT5C localization is dependent on H3K9me3 placement by SUV39H1/2<sup>35</sup> which leads to  
446 redistribution of H4K20me3 (*middle row*) and marked in increase in KMT5C mobility in  
447 *Suv39h1/2* knockout cells when assessed by FRAP (*bottom row* and Extended Data Videos 14,  
448 15) ( $n=30$ ). **b**, The histone deacetylase inhibitor trichostatin A (TSA) alters KMT5C localization  
449 and mobility, and leads to H4K20me3 redistribution (treatment was for 16-24hrs at 100nM).  
450 *Upper row*, KMT5C localization is only moderately affected by TSA treatment, but H4K20me3  
451 undergoes dramatic redistribution (*middle row*) that coincides with increased KMT5C  
452 nucleoplasmic exchange in FRAP (*bottom row* and Extended Data Video 16) ( $n=30$ ). In *a* and *b*,  
453 the schematic indicates H4K20me3 is no longer confined to the chromocenter under either  
454 condition, but that *Suv39h1/2* knockout had a larger effect on KMT5C localization, despite  
455 similar increases in mobility with TSA treatment. **c**, Laser micro-irradiation of KMT5C, MeCP2,  
456 and CBX5 differentially modulates their phase separation (Extended Data Videos 17-22). For  
457 each protein, the *top row* represents a time series that includes pre-damage (Pre), immediately  
458 following damage (4s), and at 60s (area targeted by micro-IR is indicated by facing *arrows*). The  
459 *bottom row* depicts a FRAP time series where a portion of the damaged chromocenter (*arrows* in  
460 Pre-bleach) is photobleached (*red arrow*) and recovery is monitored at 4s and either 60s  
461 (KMT5C) or 20s (MeCP2 and CBX5). Maximum image projections (MIP) are included to  
462 highlight the area of decondensed heterochromatin following damage induction and the location  
463 of the bleaching zone for mEmerald fusions of KMT5C, MeCP2, and CBX5. **d**, Comparison of  
464 pre and post irradiation images for KMT5C, MeCP2 and CBX5. While MeCP2 and CBX5  
465 behaved similarly and underwent only transient or no decrease in intensity over the damaged

466 area, KMT5C rapidly exited and accumulated in the two non-damaged lobes. **e**, Schematic  
467 summary of laser microirradiation and FRAP analyses. The *left* panel summarizes the  
468 experimental strategy, which involves using a laser to induce chromocenter DNA damage and  
469 then characterize the behavior of the exogenously expressed fusion protein, as well as its  
470 capacity to recover fluorescence following photobleaching. The DAPI series was used to monitor  
471 heterochromatin decompaction following damage, while the response of the mEmerald fusion  
472 protein was visualized over time at which point the lower portion of chromocenter was bleached  
473 in order to determine protein mobility. In both contexts, KMT5C behaved markedly different  
474 than MeCP2 and CBX5. It neither persisted in the damaged area nor exhibited fluorescence  
475 recovery.  
476

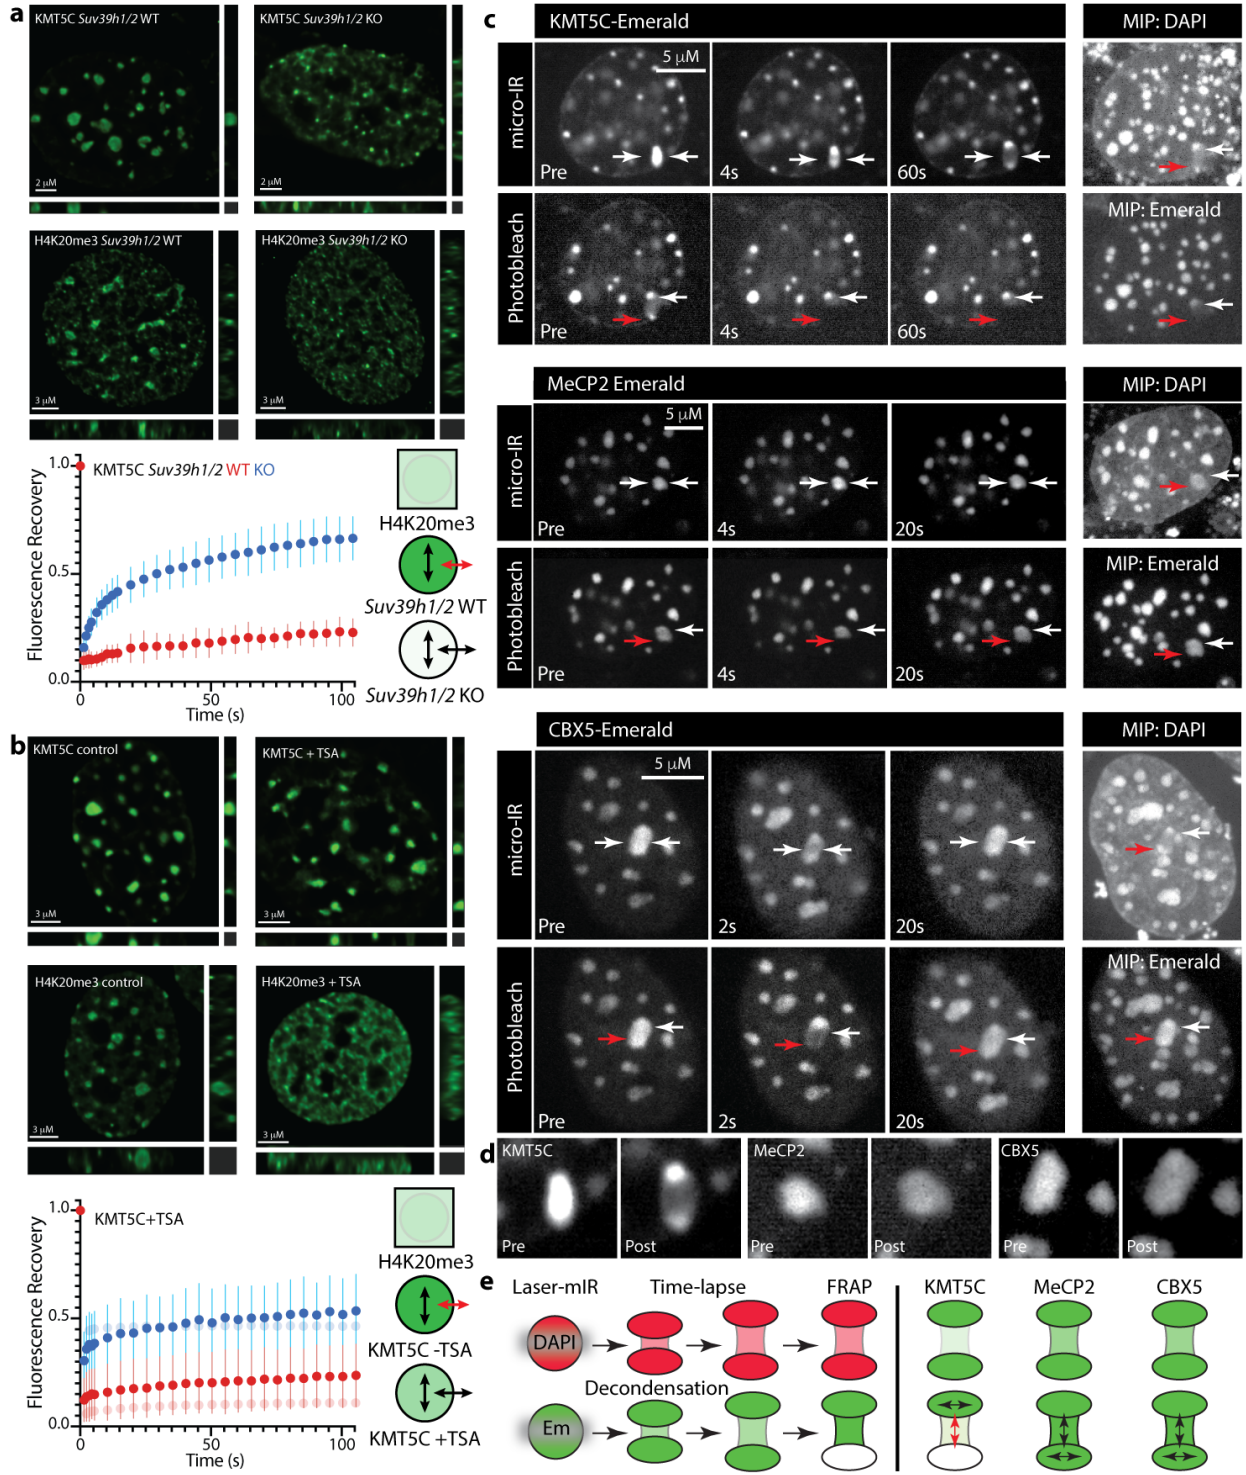

477

478 **Extended Data Figures and Legends**

479 **Figure 1. Chromocenter sphericity analysis of KMT5, MeCP2, CBX5, and all CRD**

480 **derivatives. a,** Comparison of chromocenter sphericity of full-length KMT5C ( $n=775$ ), MeCP2

481 ( $n=641$ ), and CBX5 ( $n=644$ ) indicates KMT5C supports significantly higher sphericity. **b,**

482 Comparison of chromocenter sphericity generated by CRDs from *Homo sapiens* (*Hs*;  $n=990$ ),

483 *Mus musculus* (*Mm*;  $n=421$ ), *Bubalus bubalis* (*Bb*;  $n=574$ ), and *Cavia porcellus* (*Cp*;  $n=982$ ).

484 All CRDs support efficient sphericity, although this is significantly higher for *Mm*, *Bb*, and *Cp*

485 when compared to *Hs*, which also exhibited reduced chromocenter portioning (*n.s.*) (manuscript

486 Fig. 2f) 2. Nevertheless, the human CRD supports significantly higher sphericity than MeCP2

487 ( $p<0.001$ ) and CBX5 ( $p<0.001$ ), or CRD mutants (*panel c*). **c,** Comparison of sphericity for wild-

488 type (*Hs*) and mutant CRDs (as in manuscript Fig.3e, with inclusion of difference plot). All

489 proteins were assessed in murine NMuMG breast cancer cells (see Methods).

490

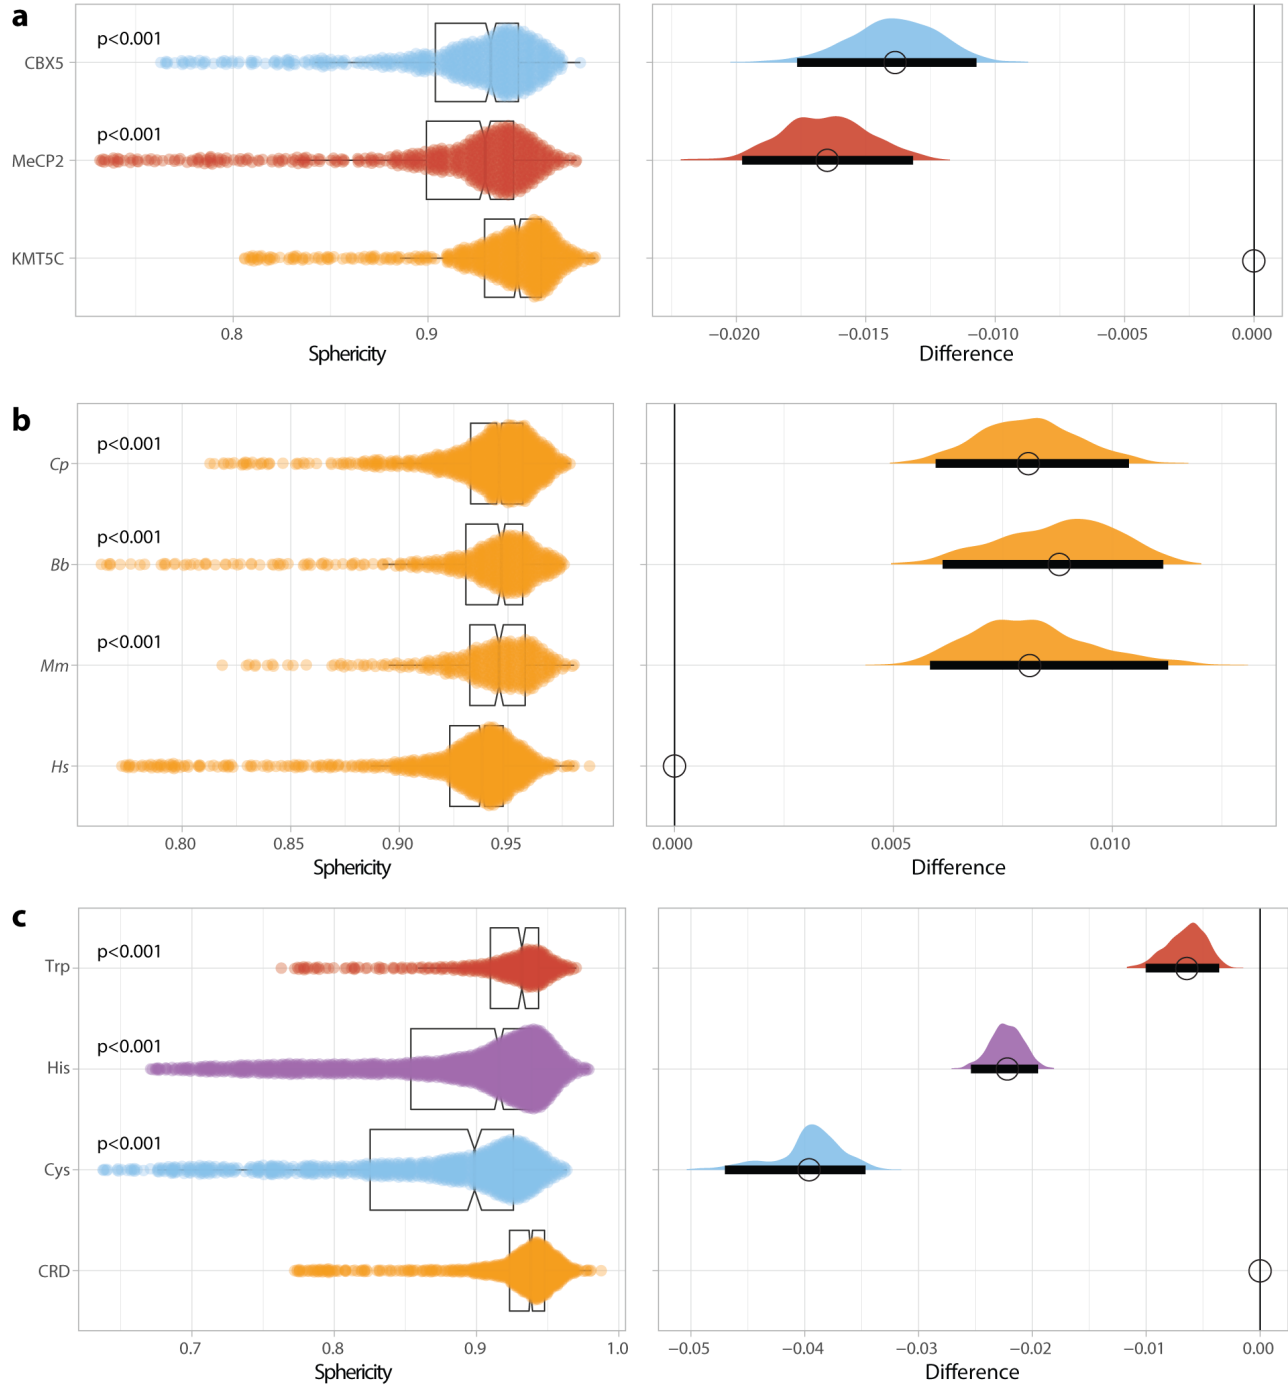

491



492 **Figure 2. Localization and FRAP of MeCP2 in *Suv39h1/2* wild-type and knockout cells. a,**  
493 MeCP2-GFP displays efficient chromocenter localization in both *Suv39h1/2* wild-type and  
494 knockout mouse embryonic fibroblasts. **b,** FRAP analysis of MeCP2-GFP reveals a decrease in  
495 mobility in *Suv39h1/2* knockout cells.  
496



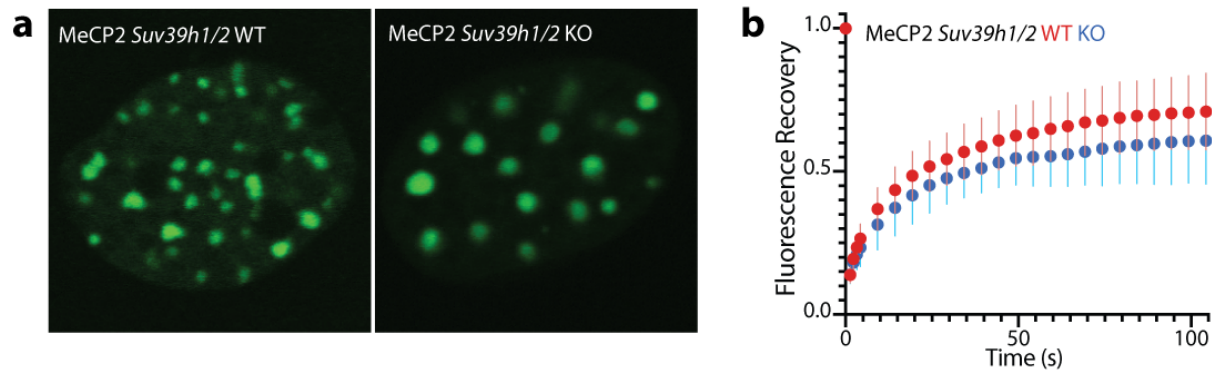

497
